# Supplementary material for: Influencing Cardiovascular Outcomes through Heart Rate Variability Modulation: A Systematic Review
Source: MDPI journal article supplement (doi:10.3390/diagnostics11122198), 2021-11-25
Supplement: s1 [file s1]

**Table S2.** Quality assessment of included studies using Newcastle-Ottawa scale.

| Study                           | Case definition | Case representativeness | Selection of controls | Definition of controls | Comparability | Exposure ascertainment | Ascertainment methods | Non-response rate | Total |
|---------------------------------|-----------------|-------------------------|-----------------------|------------------------|---------------|------------------------|-----------------------|-------------------|-------|
| Bernardi et al, 2002            | *               | *                       | *                     | *                      | *             | *                      | *                     |                   | 7     |
| Albuquerque Cacique et al, 2021 | *               | *                       | *                     | NA                     | NA            | *                      | *                     |                   | 5     |
| Joseph et al, 2005              | *               | *                       | *                     | *                      | *             | *                      | *                     |                   | 7     |

NA = not applicable.

Good quality: 3 or 4 stars in selection domain AND 1 or 2 stars in comparability domain AND 2 or 3 stars in outcome/exposure domain. Fair quality: 2 stars in selection domain AND 1 or 2 stars in comparability domain AND 2 or 3 stars in outcome/exposure domain. Poor quality: 0 or 1 star in selection domain OR 0 stars in comparability domain OR 0 or 1 stars in outcome/exposure domain.
