# Supplementary material for: Influencing Cardiovascular Outcomes through Heart Rate Variability Modulation: A Systematic Review
Source: MDPI journal article supplement (doi:10.3390/diagnostics11122198), 2021-11-25
Supplement: s1 [file s1]

**Table S1.** Databases and search strategies used in present systematic review

| Database          | Coverage        | Search run                                                                                                                                                      | Records |
|-------------------|-----------------|-----------------------------------------------------------------------------------------------------------------------------------------------------------------|---------|
| MEDLINE           | 1946 to present | “(heart rate variability) AND ((biofeedback) OR (resonance frequency breathing))”                                                                               | 97      |
|                   |                 | “(heart rate variability) AND ((biofeedback) OR (resonance frequency breathing)) AND ((heart failure) OR (coronary artery disease) OR (arterial hypertension))” | 17      |
|                   |                 | “(heart rate variability) AND ((biofeedback) OR (resonance frequency breathing)) AND ((cardiovascular events) OR (mortality))”                                  | 5       |
|                   |                 | Total records = 119                                                                                                                                             |         |
| Embase            | 1966 to present | “(heart rate variability) AND ((biofeedback) OR (resonance frequency breathing))”                                                                               | 34      |
|                   |                 | “(heart rate variability) AND ((biofeedback) OR (resonance frequency breathing)) AND ((heart failure) OR (coronary artery disease) OR (arterial hypertension))” | 5       |
|                   |                 | “(heart rate variability) AND ((biofeedback) OR (resonance frequency breathing)) AND ((cardiovascular events) OR (mortality))”                                  | 6       |
|                   |                 | Total records = 45                                                                                                                                              |         |
| Cochrane library  | 1967 to present | “(heart rate variability) AND ((biofeedback) OR (resonance frequency breathing))”                                                                               | 244     |
|                   |                 | “(heart rate variability) AND ((biofeedback) OR (resonance frequency breathing)) AND ((heart failure) OR (coronary artery disease) OR (arterial hypertension))” | 23      |
|                   |                 | “(heart rate variability) AND ((biofeedback) OR (resonance frequency breathing)) AND ((cardiovascular events) OR (mortality))”                                  | 21      |
|                   |                 | Total records = 288                                                                                                                                             |         |
| ALL RECORDS = 452 |                 |                                                                                                                                                                 |         |
